# Supplementary material for: An Alternative Enzymatic Route to the Ergogenic Ketone Body Ester (R)-3-Hydroxybutyl (R)-3-Hydroxybutyrate
Source: Preprints.org preprint supplement (doi:10.20944/preprints202012.0653.v1), 2020-12-25
Supplement: Supplementary file 1 [file supplementary]

# Catalysis

## An Alternative Enzymatic Route to the Ergogenic Ketone Body Ester (R)-3-Hydroxybutyl (R)-3-Hydroxybutyrate

Ferdinando Zaccone 1, Valentina Venturi 1, Pier Paolo Giovannini 1,\*  
Claudio Trapella1,..

### Supplementary Materials

#### Contents

|                                                                                   |           |
|-----------------------------------------------------------------------------------|-----------|
| <sup>1</sup> H- and <sup>13</sup> C-NMR spectra of compound <b>4</b>              | <b>S1</b> |
| <sup>1</sup> H- and <sup>13</sup> C-NMR spectra of compound <b>5</b>              | <b>S2</b> |
| <sup>1</sup> H- and <sup>13</sup> C-NMR spectra of compound <b>6</b>              | <b>S3</b> |
| <sup>1</sup> H- and <sup>13</sup> C-NMR spectra of compound <b>9</b>              | <b>S4</b> |
| Chiral phase GC of (R,R)- <b>4</b> and (R,R)/(R,S)- <b>4</b> mixture              | <b>S5</b> |
| Chiral phase GC of acetylated (R)- <b>2</b> from (S)- <b>2</b> inversion          | <b>S6</b> |
| Chiral phase GC of acetylated (R)- <b>3</b> from kinetic resolution rac- <b>3</b> | <b>S7</b> |
| Chiral phase GC of (R)- <b>6</b> from inversion of (S)- <b>5</b>                  | <b>S8</b> |

# $^1\text{H}$ - and $^{13}\text{C}$ -NMR spectra of compound 4

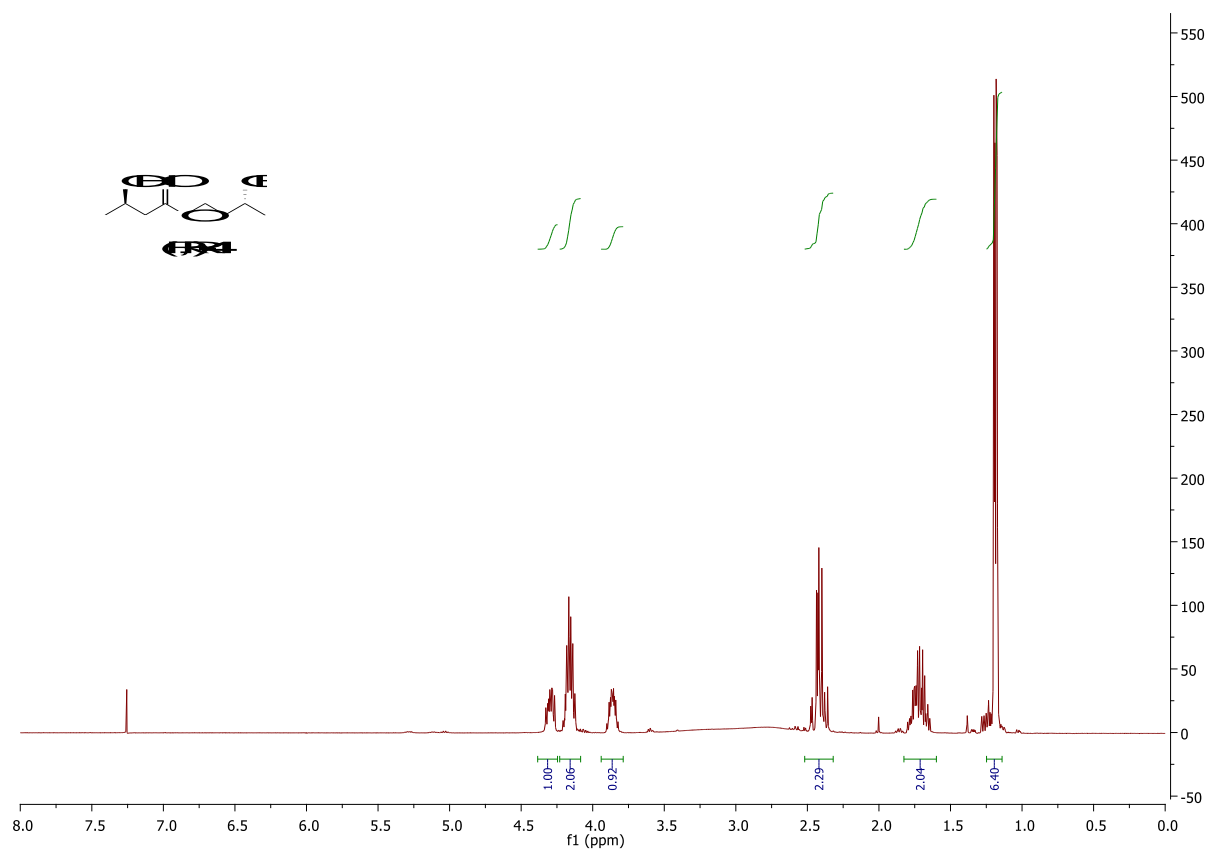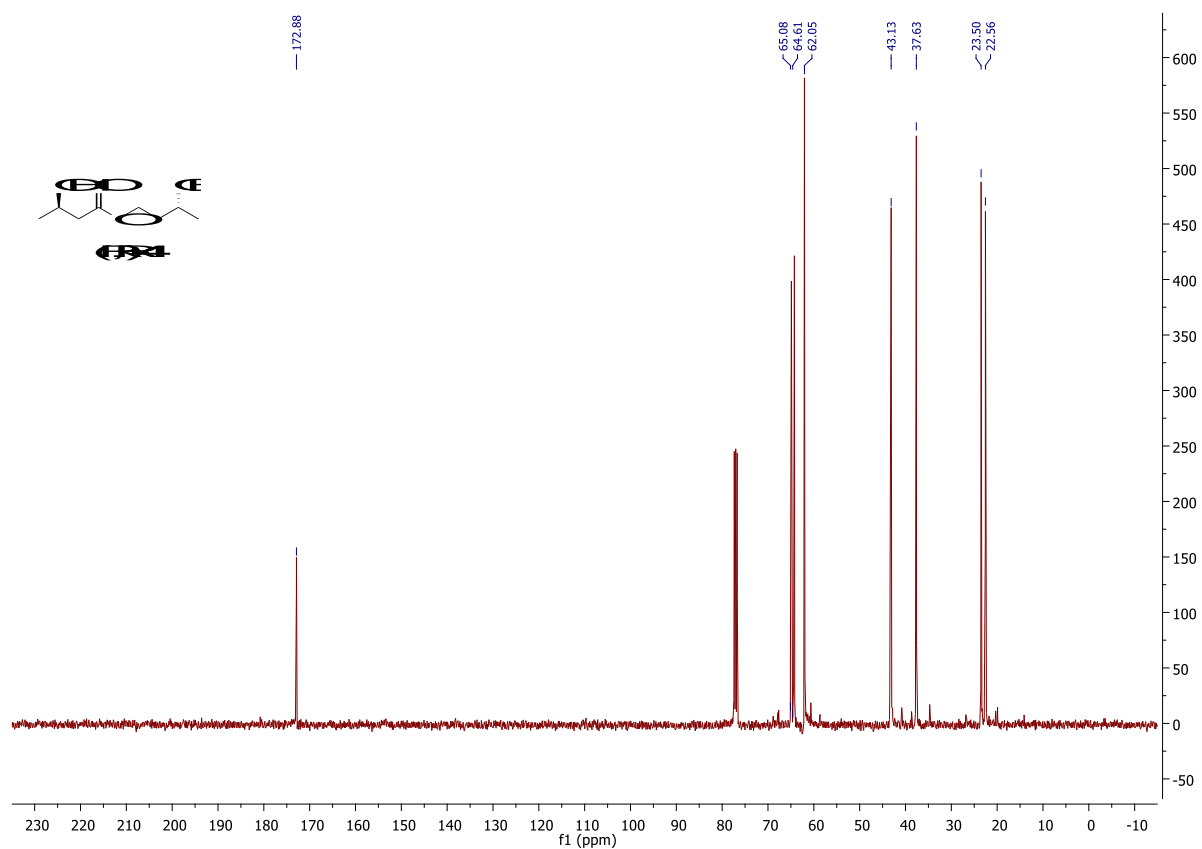

# <sup>1</sup>H- and <sup>13</sup>C-NMR spectra of compound 5

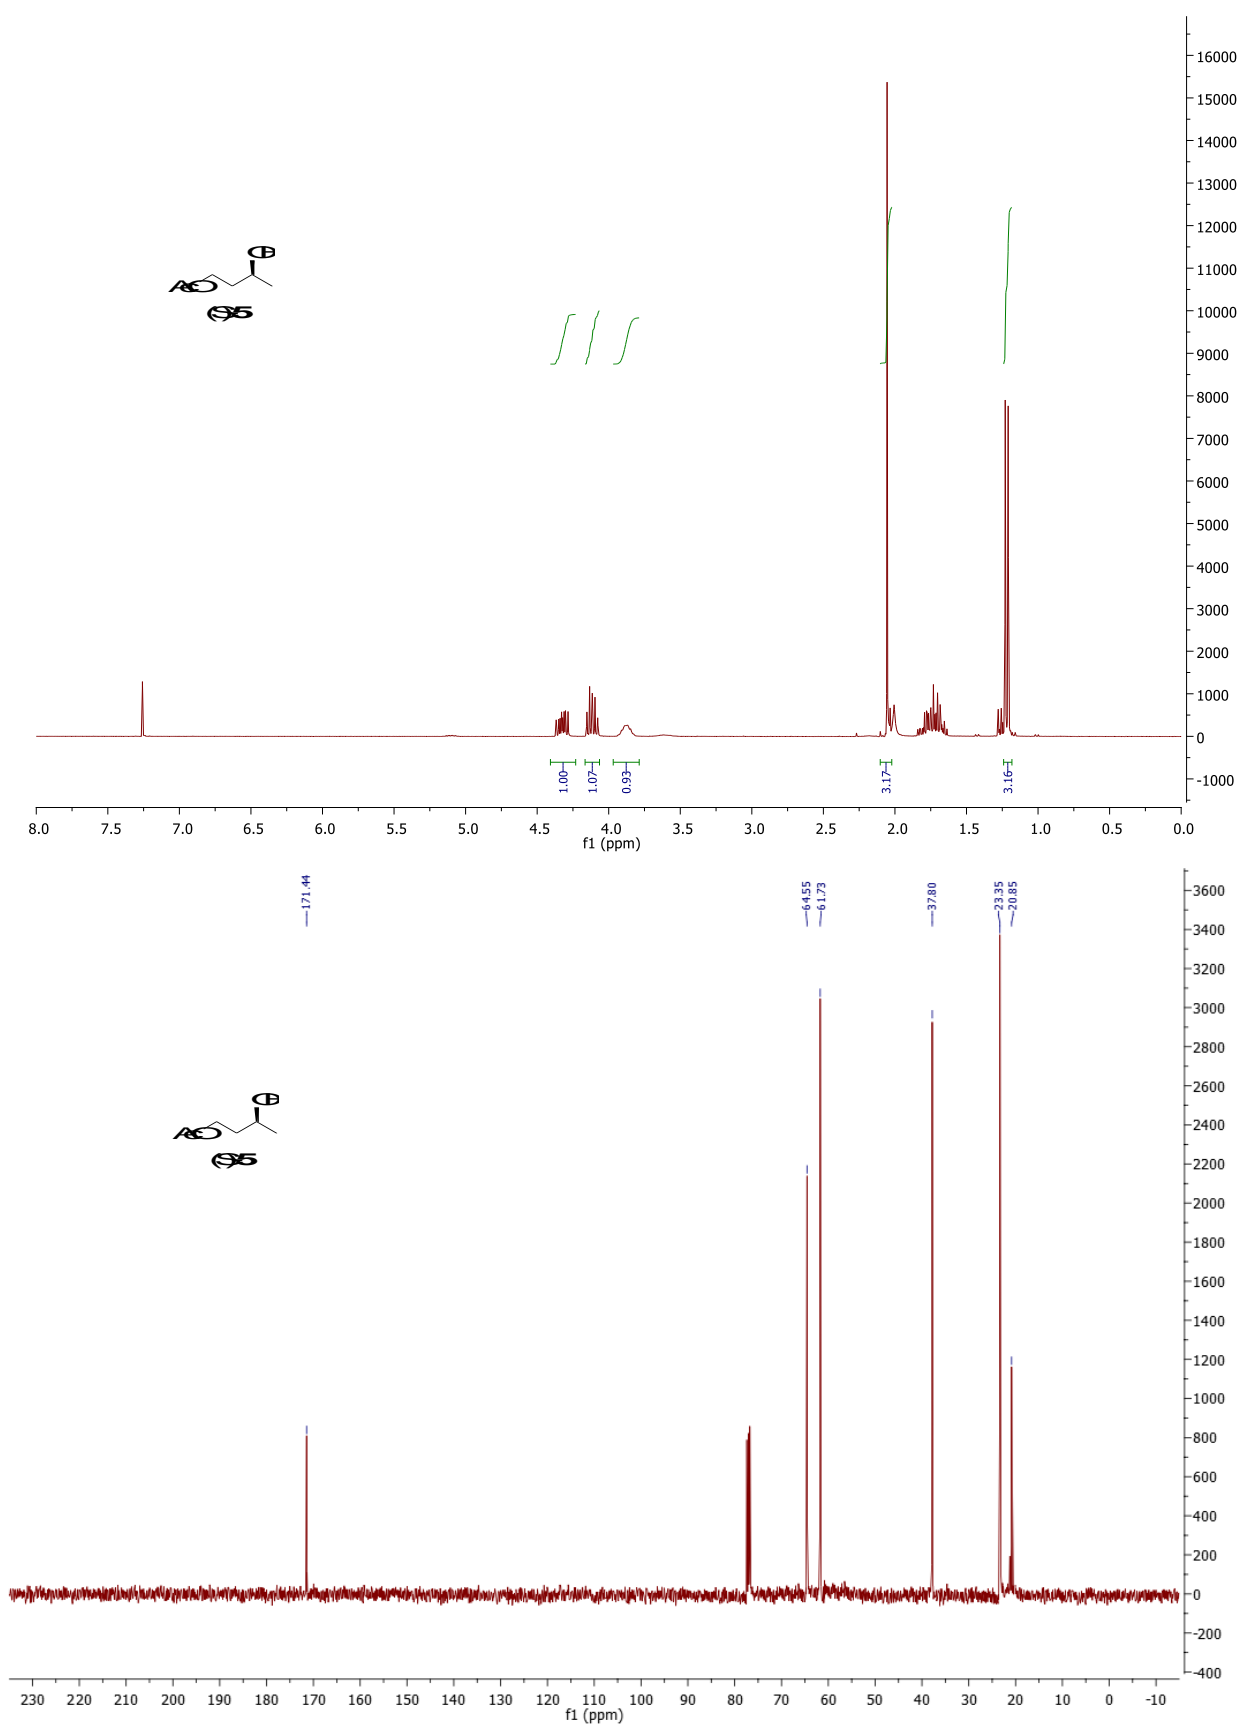

# $^1\text{H}$ - and $^{13}\text{C}$ -NMR spectra of compound 6

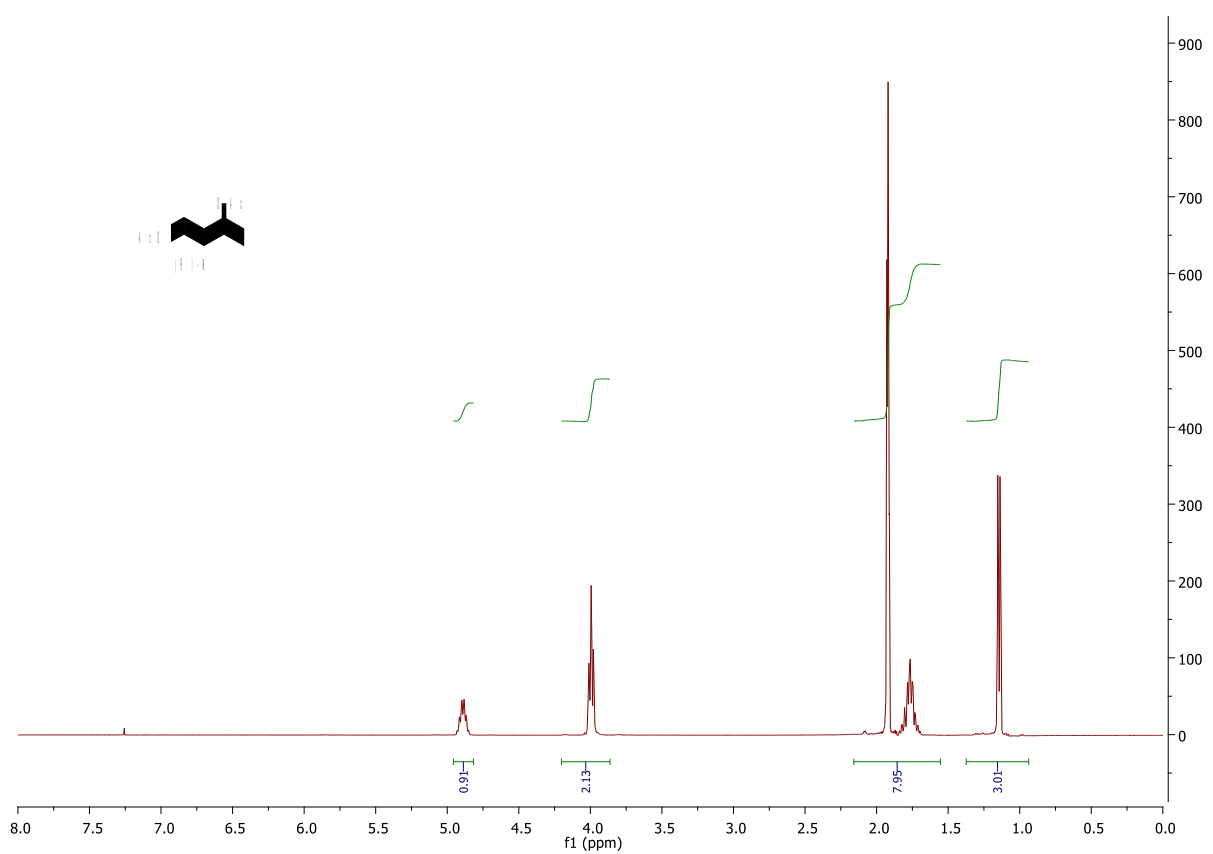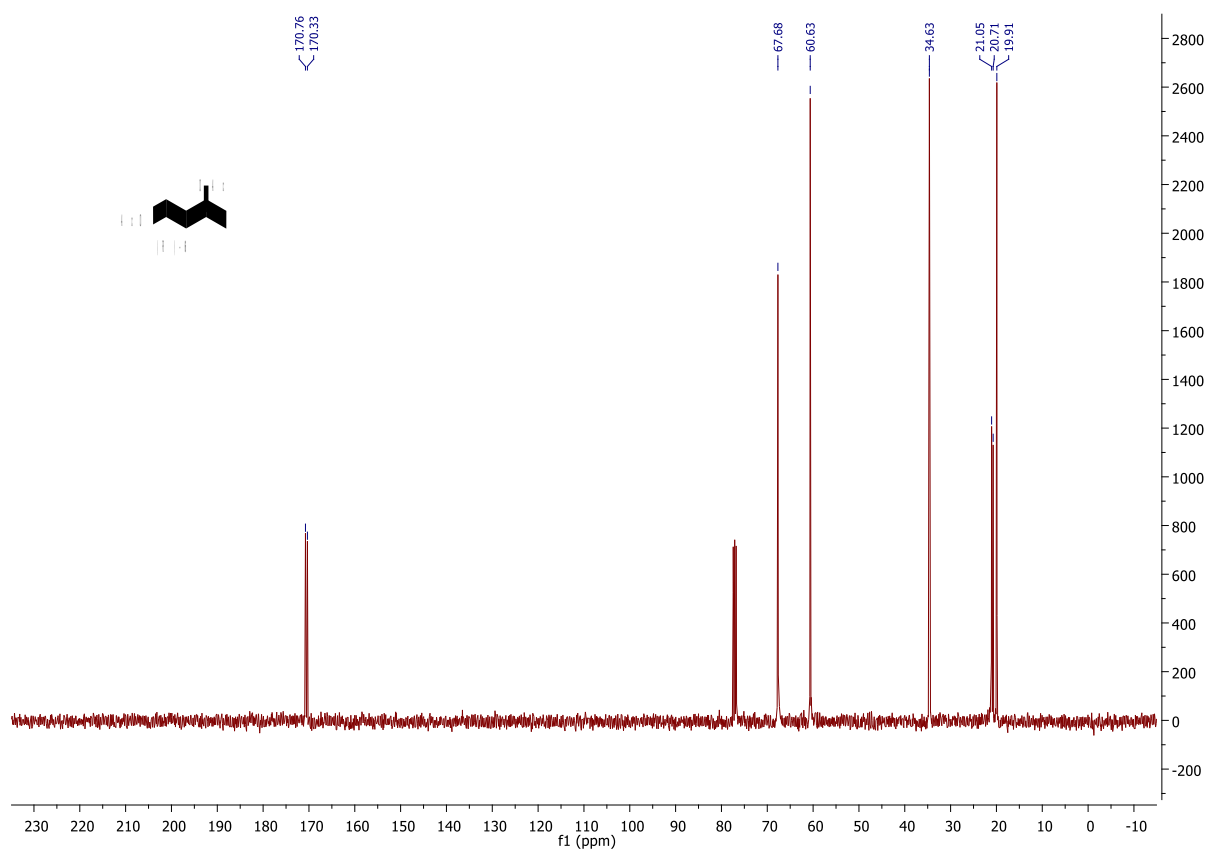

CC(C)[C@H](COc1ccc(C)cc1)C(=O)OC  
(S)-**9**

<sup>1</sup>H NMR spectrum (CDCl<sub>3</sub>) of (S)-**9**. The x-axis represents the chemical shift in ppm (f1), ranging from 0.0 to 8.0. The y-axis represents intensity, ranging from -100 to 1200. The spectrum shows several peaks corresponding to the structure of (S)-**9**. Key peaks include aromatic signals between 7.0 and 8.0 ppm, a methine signal around 4.7 ppm, a methoxy singlet around 3.8 ppm, a methylene doublet around 2.5 ppm, a large methine multiplet around 2.0 ppm, and a methyl singlet around 1.3 ppm. Integration values are provided below the peaks: 2.08, 2.18, 1.00, 1.16, 1.27, 3.56, 6.06, and 3.54. Green curly brackets indicate coupling patterns: doublets at 7.7 and 7.4, a doublet at 4.7, a doublet at 2.5, and a doublet at 1.3. A green line connects the peaks at 2.0 and 2.5.

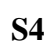

# Chiral phase GC of (R,R)-**4** and (R,R)/(R,S)-**4** mixture

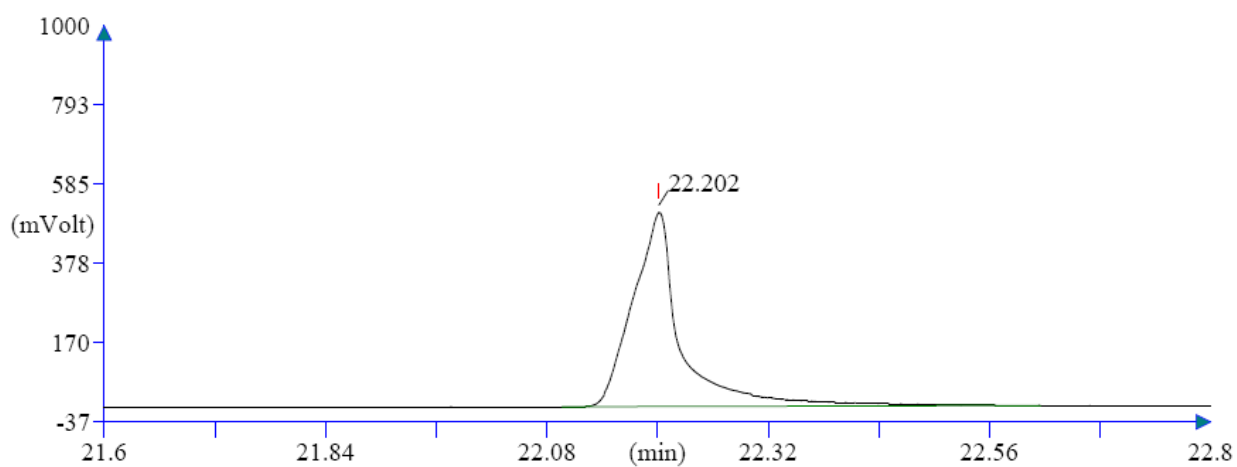

| Retention Time<br>(min) | Area<br>(.1*uV*sec) | Area %<br>(%) | Original Conc | Co |
|-------------------------|---------------------|---------------|---------------|----|
| 22.202                  | 18626870            | 100.000       | 100.000       |    |
|                         | 18626870            |               | 100.000       |    |

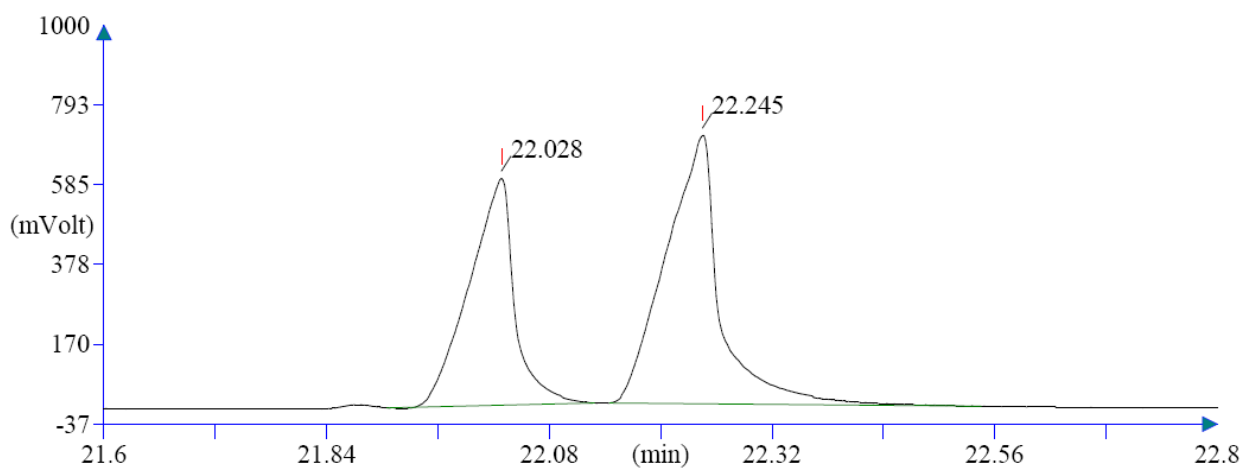

| Retention Time<br>(min) | Area<br>(.1*uV*sec) | Area %<br>(%) | Original Conc | Co |
|-------------------------|---------------------|---------------|---------------|----|
| 22.028                  | 20120600            | 41.202        | 41.202        |    |
| 22.245                  | 28713300            | 58.798        | 58.798        |    |
|                         | 48833900            |               | 100.000       |    |

Chiral phase GC of acetylated (R)-2 from (S)-2 inversion

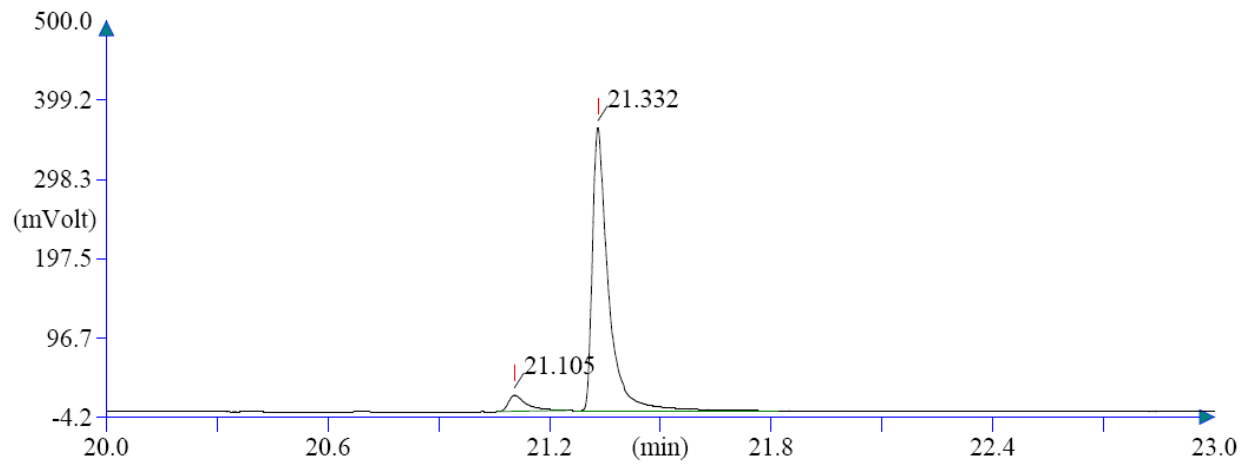

| Retention Time<br>(min) | Area<br>(.1*uV*sec) | Area %<br>(%) | Original Conc | Con |
|-------------------------|---------------------|---------------|---------------|-----|
| 21.105                  | 708121              | 6.096         | 6.096         |     |
| 21.332                  | 10908030            | 93.904        | 93.904        |     |
|                         | 11616150            |               | 100.000       |     |

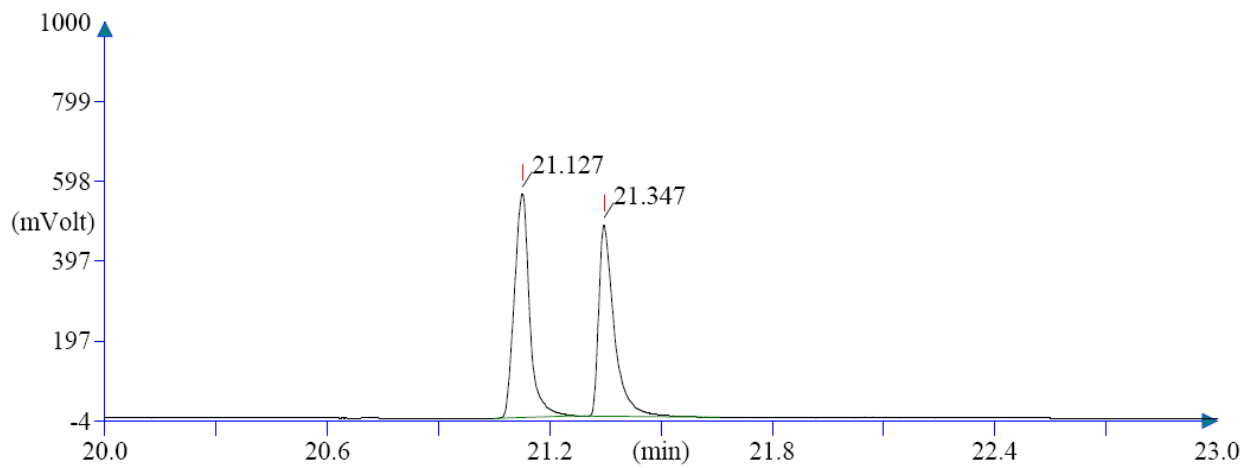

| Retention Time<br>(min) | Area<br>(.1*uV*sec) | Area %<br>(%) | Original Conc | Con |
|-------------------------|---------------------|---------------|---------------|-----|
| 21.127                  | 16122260            | 53.444        | 53.444        |     |
| 21.347                  | 14044540            | 46.556        | 46.556        |     |
|                         | 30166800            |               | 100.000       |     |

# Chiral phase GC of acetylated (R)-3 from kinetic resolution rac-3

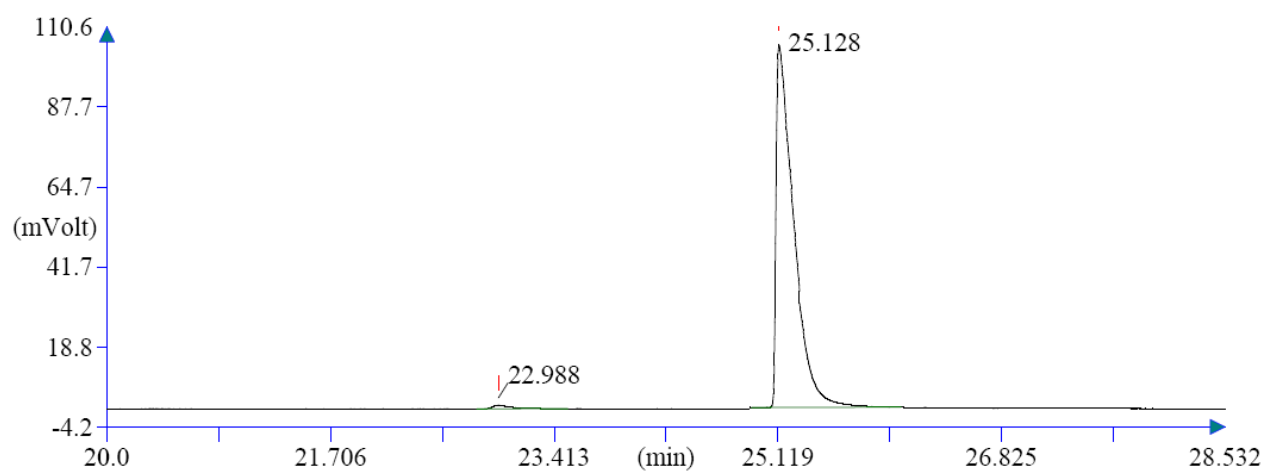

| Retention Time<br>(min) | Area<br>(.1*uV*sec) | Area %<br>(%) | Original Conc | Cor |
|-------------------------|---------------------|---------------|---------------|-----|
| 22.988                  | 108327              | 1.103         | 1.103         |     |
| 25.128                  | 9713536             | 98.897        | 98.897        |     |
|                         | 9821863             |               | 100.000       |     |

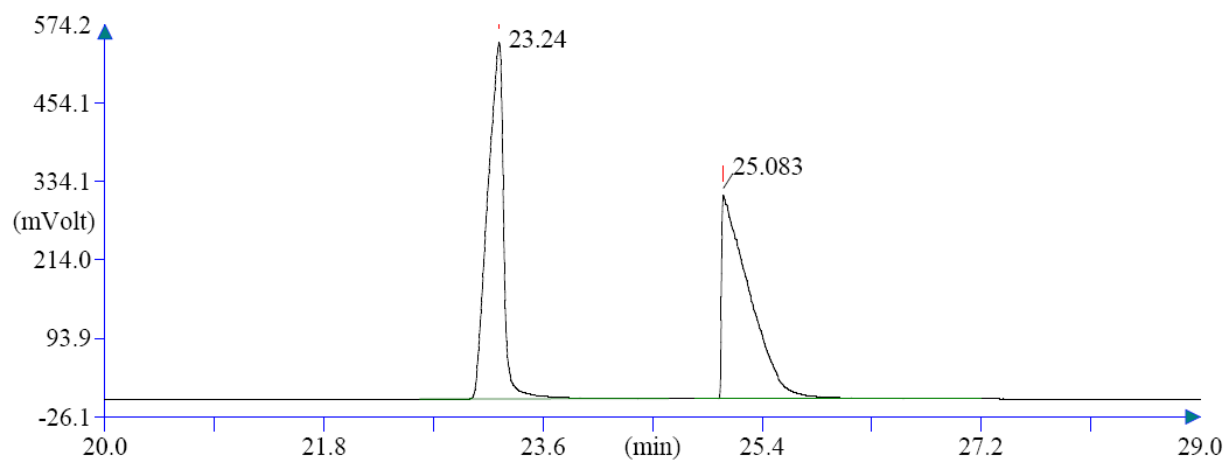

| Retention Time<br>(min) | Area<br>(.1*uV*sec) | Area %<br>(%) | Original Conc | Con |
|-------------------------|---------------------|---------------|---------------|-----|
| 23.240                  | 50110000            | 50.339        | 50.339        |     |
| 25.083                  | 49436020            | 49.661        | 49.661        |     |
|                         | 99546020            |               | 100.000       |     |



# Chiral phase GC of (R)-6 from inversion of (S)-5

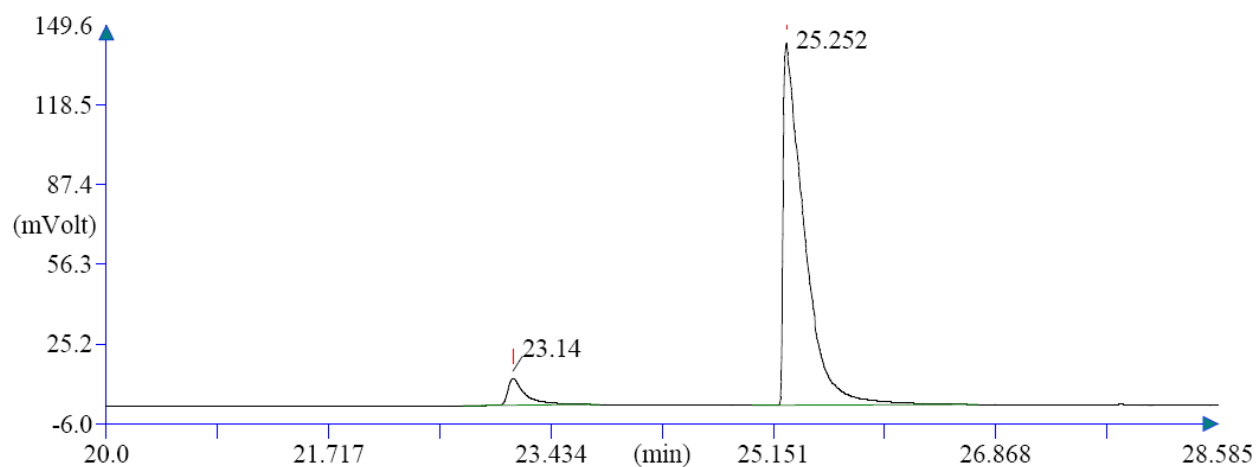

| Retention Time<br>(min) | Area<br>(.1*uV*sec) | Area %<br>(%) | Original Conc | Con |
|-------------------------|---------------------|---------------|---------------|-----|
| 23.140                  | 1013249             | 5.989         | 5.989         |     |
| 25.252                  | 15906180            | 94.011        | 94.011        |     |
|                         | 16919430            |               | 100.000       |     |

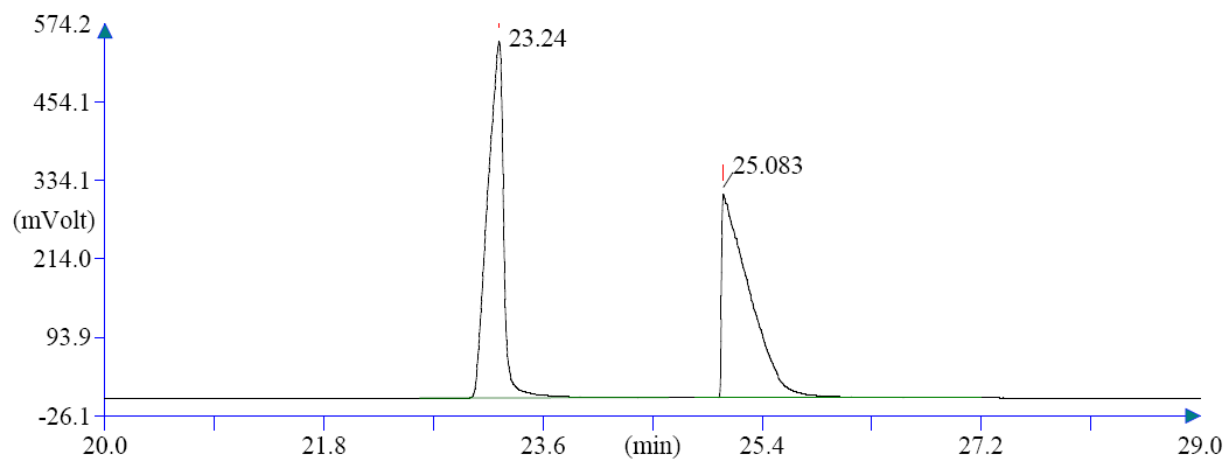

| Retention Time<br>(min) | Area<br>(.1*uV*sec) | Area %<br>(%) | Original Conc | Con |
|-------------------------|---------------------|---------------|---------------|-----|
| 23.240                  | 50110000            | 50.339        | 50.339        |     |
| 25.083                  | 49436020            | 49.661        | 49.661        |     |
|                         | 99546020            |               | 100.000       |     |
